# Supplementary material for: Energy, economic, and environmental impacts assessment of co-optimized on-road heavy-duty engines and bio-blendstocks
Source: Royal Society of Chemistry journal article supplement (doi:10.1039/d3se00381g), 2023-01-01
Supplement: d3se00381g1.pdf [file d3se00381g1.pdf]

1 **Supporting Information for Energy, Economic, and Environmental Benefits Assessment of Co-**  
2 **Optimized On-Road Heavy-Duty Engines and Bio-Blendstocks**

3 Doris Oke<sup>a,d</sup>, Lauren Sittler<sup>b</sup>, Hao Cai<sup>a</sup>, Andre Avelino<sup>b</sup>, Emily Newes<sup>b</sup>, Greg Zaimes<sup>a</sup>, Yimin Zhang<sup>b</sup>,  
4 Longwen Ou<sup>a</sup>, Avantika Singh<sup>c</sup>, Jennifer B. Dunn<sup>a,d</sup>, Troy R. Hawkins<sup>a,\*</sup>

5 Affiliations

6 <sup>a</sup> *Systems Assessment Center, Energy Systems and Infrastructure Analysis Division, Argonne National*  
7 *Laboratory*

8 <sup>b</sup> *Strategic Energy Analysis Center, National Renewable Energy Laboratory*

9 <sup>c</sup> *Catalytic Carbon Transformation and Scale-Up Center, National Renewable Energy Laboratory*

10 <sup>d</sup> *Department of Chemical and Biological Engineering, Northwestern University, Evanston, IL, USA*

11 \*thawkins@anl.gov

12 **Table of Contents**

|    |                                                                 |    |
|----|-----------------------------------------------------------------|----|
| 13 | ADOPT.....                                                      | 2  |
| 14 | Job Analysis Methodology.....                                   | 4  |
| 15 | Additional Information on the Biomass Scenario Model (BSM)..... | 7  |
| 16 | Carbon Tax Additional Information.....                          | 7  |
| 17 | Vehicle Analysis Additional Results.....                        | 9  |
| 18 | Job Analysis Additional Results.....                            | 10 |
| 19 | Sensitivity Analysis.....                                       | 11 |

20

21

22

23

24

25

26

27

28 **ADOPT**

29 Three triggers instigate the creation of new vehicle options. One trigger creates new variations of a vehicle  
 30 when it sells exceptionally well for its price. Another creates additional options for several years when a  
 31 new powertrain is introduced. A third creates new options for the best-selling powertrain. Poorly selling  
 32 options are discontinued by ADOPT. New vehicle options are created by copying high-selling models and  
 33 optimizing the component sizing based on future-year conditions to achieve the best-selling combination  
 34 of vehicle attributes in new model options. The best-selling powertrains evolve the most over time.

35 Cost and performance specifications of new vehicles include assumptions about the evolution of battery,  
 36 fuel cell, hydrogen storage, motor, and compression ignition engine technology. Figures A1-A3. show key  
 37 technology cost and performance assumptions used in ADOPT for this analysis.

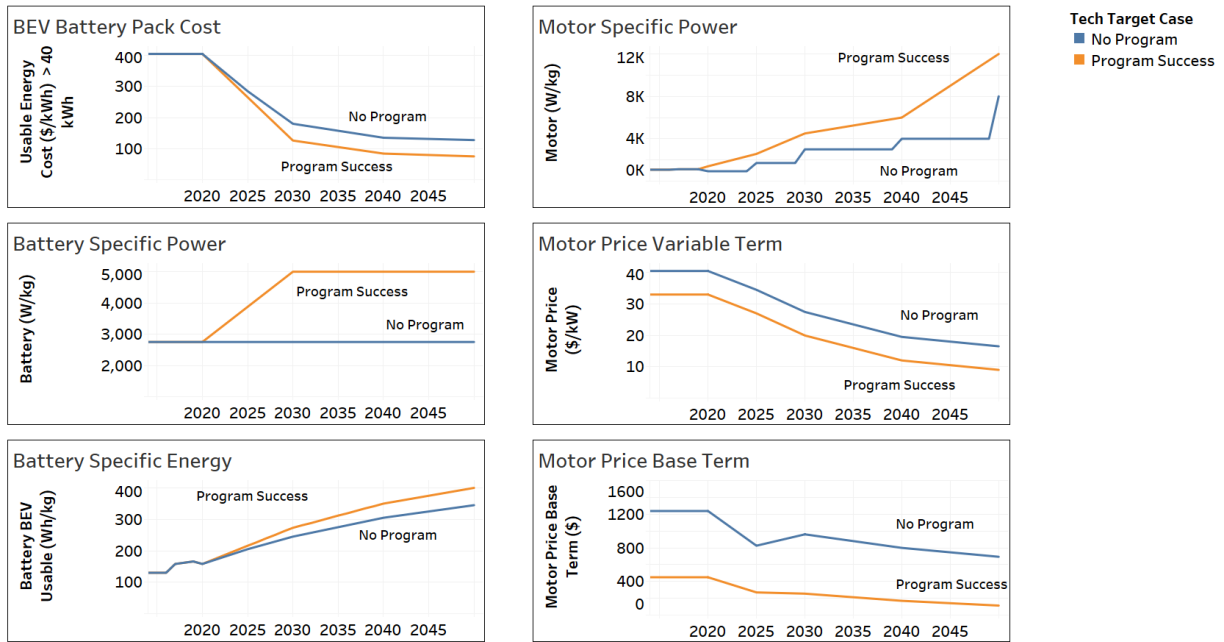

38  
 39 Figure A1. Battery and Motor Technology Cost and Performance Assumptions for the No Program and  
 40 Program Success Cases

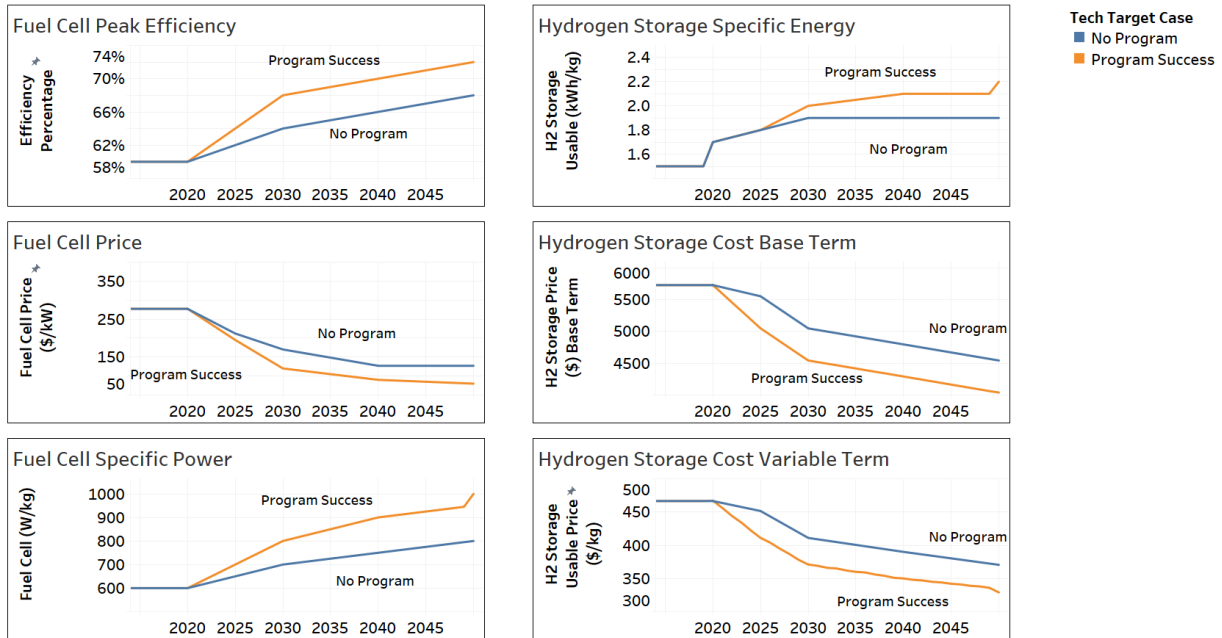

41  
 42 Figure A2. Fuel Cell and Hydrogen Storage Technology Cost and Performance Assumptions for the No  
 43 Program and Program Success Cases

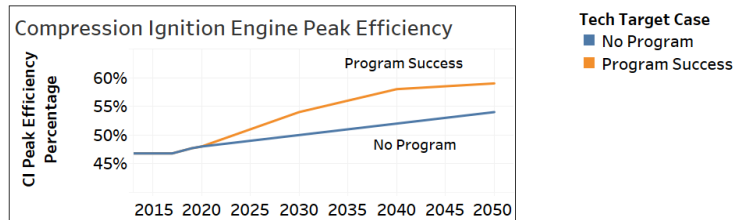

44  
 45 Figure A3. Compression Ignition Engine Peak Efficiency Assumptions for the No Program and Program  
 46 Success Cases

47 Fuel prices used in this analysis are shown in Figure A4 for diesel, electricity, and hydrogen. Diesel and  
 48 electricity price inputs were the same for all cases and were based on prices from the EIA Annual Energy  
 49 Outlook (AEO) 2021 Reference Case.<sup>1</sup> Hydrogen prices differed between the No Program and Program  
 50 Success cases and were set by the Hydrogen Fuel Cell Technology Office. Co-optimized fuel prices were  
 51 set equal to diesel prices on a per gallon basis.

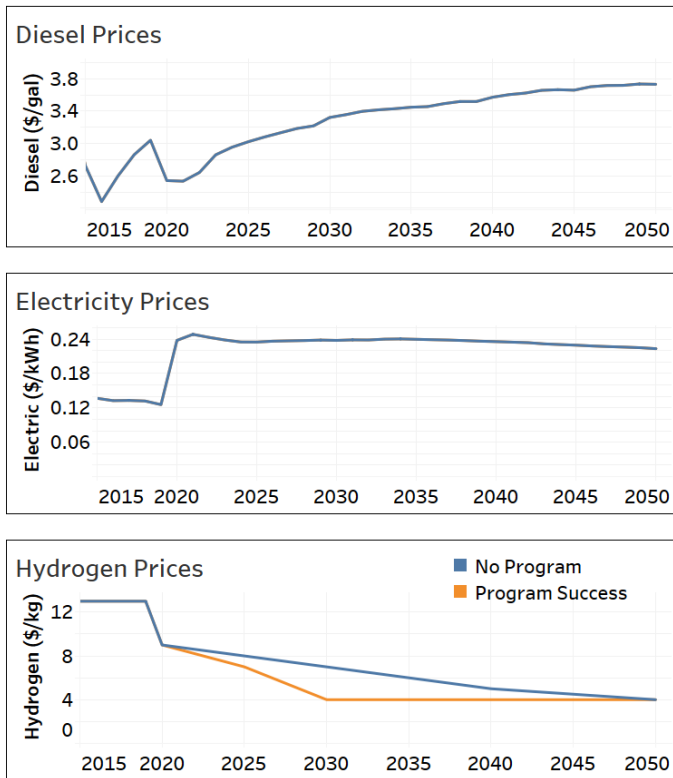

52

53 Figure A4. Diesel, Electricity, and Hydrogen Prices used in ADOPT scenarios for the No Program and  
 54 Program Success Cases

55 **Job Analysis Methodology**

56 Economic impact analysis is often used to calculate changes in employment, income, and tax revenues  
 57 that could result from new or existing economic activities.<sup>2-3</sup> The fundamental rationale behind economic  
 58 impact analysis is that changes in economic activity are multiplied through the entire economy because  
 59 of inter-sectorial linkages, i.e., flows of commodities and services between sectors. In other words, a  
 60 change in inputs required for production in one sector results in a cascading change in demand throughout  
 61 its upstream supply chain that involves all the supply-chains of each input supplier, ultimately affecting all  
 62 sectors of the economy (with various degrees of intensity). Input-output analysis is one of the most  
 63 commonly used approaches to tracking the ripple effects of changes in economic activity throughout an  
 64 economy.<sup>3</sup>

65 Input-output analysis has been widely used to assess the contribution of existing energy sectors in the  
 66 U.S. economy.<sup>4-7</sup> In modeling the what-if scenarios, where a new industry is assumed to be introduced to  
 67 the existing economy in the future, input-output analysis has also been widely applied. For instance, a  
 68 study from IHS Markit<sup>2</sup> evaluated the expansion of unconventional oil and natural gas from 2012-2025 in  
 69 terms of GDP, employment, and tax revenue contributions to the U.S. economy. In that work, expected  
 70 capital investments (expenditures in equipment and buildings) and changes to production linked to the  
 71 sector were used as shocks in the economy to determine annual impacts. Similarly, Lamers et al. estimated  
 72 the economic and environmental impacts of a future 5 billion gallon cellulosic ethanol industry from two  
 73 pathways (biochemical and thermochemical), using the same model employed in this paper (BEIOM).<sup>8</sup> Net

74 impacts were estimated by displacing gasoline on an energy basis. The approach used in Lamers et al.<sup>8</sup> is  
75 similar to the one used in this paper to evaluate net direct and indirect effects. Jackson et al. estimated  
76 the impact of introducing three different pathways using woody biomass as their main feedstocks in a  
77 rural area in central Appalachia.<sup>9</sup> A meta-analysis of studies looking at the impact of different advanced  
78 biofuels pathways is also available from bio-era.<sup>10</sup>

79 To estimate the employment impacts resulting from the adoption of new MCCI bio-blendstocks, we  
80 expanded the original Bio-based circular carbon economy Environmentally-extended Input-Output  
81 Model, or BEIOM with new pathway-specific sectors.<sup>11</sup> We did this by leveraging the most up-to-date cost  
82 data (e.g., from techno-economic analysis) along with feedstock production and logistics data from BSM  
83 outputs to model the supply chain and relevant expenditures associated with each bio-blendstock  
84 pathway examined in this analysis.

85 BEIOM is a demand-driven input-output model (a commonly used method in economic impact analysis)  
86 that estimates the economic effects, including new jobs created, from the expenditures made by  
87 biorefineries during their construction and operation phases. Input-output analysis requires a detailed  
88 accounting of expenditures and proper allocation of each expenditure to the impacted sectors within an  
89 economy. The economic sectors affected by each expenditure are identified by matching the description  
90 of the expenditure (e.g., type of equipment purchased and installed) with the North American Industry  
91 Classification System (NAICS). NAICS is a standard used by federal agencies (e.g., U.S. Bureau of Economic  
92 Analysis) to classify business establishments for the purpose of collecting and analyzing statistical data  
93 related to the U.S. economy. BSM/ADOPT simulation results such as changes in demand for MCCI bio-  
94 blendstocks are used to inform the model inputs to BEIOM for estimating the jobs impacts.

95 In addition to quantifying the new jobs that would be created by growth in demand for MCCI bio-  
96 blendstocks, the employment change in the mature petroleum industry resulting from the change in  
97 petroleum consumption (estimated by ADOPT/BSM) is also considered in the model. To estimate the  
98 potential employment change in the petroleum industry due to the introduction of new bio-blendstocks,  
99 we modified the underlying input-output table used in BEIOM to account for the new production levels  
100 of diesel and substitution between diesel and the new biofuel blendstock. Fuel substitution in each sector  
101 is performed on an energy basis and then converted into dollar values, similar to the approach employed  
102 in Lamers et al.<sup>8</sup>

103 The BEIOM model used in this study is based on the national 2012 input-output benchmark table from  
104 the U.S. Bureau of Economic Analysis, which includes 405 commodities and 405 sectors.<sup>12</sup> The model is in  
105 constant 2012 prices. Employment data are based on the National Income and Products Accounts for 2017  
106 and comprise two metrics: full-time equivalent jobs and full-time plus part-time jobs.<sup>13</sup> The former  
107 provides a lower bound for our estimates, while the latter, an upper bound. For this analysis, we focus on  
108 direct and indirect (ripple effects throughout different supply-chains) job effects.

109 To better capture fuel substitution effects, the outputs from the petroleum refining sector were further  
110 disaggregated into diesel, gasoline, jet fuel, kerosene, and other petroleum refineries' products.<sup>8</sup> BEIOM  
111 also has disaggregated sectors for corn ethanol and soybean biodiesel supply chains.<sup>11</sup> Following the same  
112 approach described in Lamers et al.<sup>8</sup>, additional biofuel pathways were introduced into BEIOM based on  
113 techno-economic analysis (TEA) for each pathway as shown in Table A1. All MCCI pathways were created  
114 using n<sup>th</sup>-plant assumptions. Operation and construction expenses were derived from the TEAs and  
115 encompass equipment, buildings, raw and intermediate materials, and direct labor requirements (for

116 plant operation). These itemized expenses were then matched to the commodity- level aggregation in  
 117 BEIOM.

118 Table A1. Additional MCCI bio-blendstock pathways introduced in BEIOM

| <b>MCCI Bioblendstock</b> | <b>Feedstock</b> | <b>n<sup>th</sup> Plant Size</b> | <b>Data Source</b>                |
|---------------------------|------------------|----------------------------------|-----------------------------------|
| POME                      | Forestry Residue | (MMgal/yr)*53.7                  | Dutta et al. <sup>14</sup>        |
| AAEE                      | Corn Stover      |                                  |                                   |
| HEFA Swine HTL            | Swine Manure     | 28.0                             | Snowden-Swan et al. <sup>15</sup> |
| Sludge HTL                | Sludge           | 28.0                             | Snowden-Swan et al. <sup>15</sup> |
| FOG via HEFA              | Used Cooking Oil | 34.2                             | Tao et al. <sup>16</sup>          |

119 \*Bio-blendstock actual production per year.

120 As illustrated in Figure 2 in the main manuscript, BEIOM uses external information generated from  
 121 BSM/ADOPT to simulate technology change, fuel substitution, and production levels in each year.  
 122 Construction impacts are based on the number of new biorefineries projected (by BSM) to be built to  
 123 produce bio-blendstocks to meet demand. We assume a typical 3-year construction spending schedule  
 124 (Year 1, 8%; Year 2, 60%; Year 3, 32%), with the plant fully operational by Year 4. Construction costs and  
 125 itemization are technology-specific (Table A2) and are scaled from an n<sup>th</sup> size plant according to the actual  
 126 size provided by BSM. The average yield of the biorefineries' portfolio in each year is used to scale the  
 127 variable costs of biorefineries in BEIOM. Total fuel production informs the required production levels for  
 128 each year. Demand is then allocated between final demand and sectors according to the consumption  
 129 structure of 2012 for diesel and any substitution effect is done on an energy basis. The BEIOM model  
 130 accounts for changes in fuel yield for each bio-blendstock pathway over time according to outputs from  
 131 the BSM model, modifying the production function of the industry, which produces the biofuel.

132 Table A2. Construction, annual O&M costs, and jobs per plant by pathway

| <b>MCCI Bioblendstock</b> | <b>Construction (million 2012\$)</b> | <b>Annual O&amp;M (million 2012\$)</b> | <b>Direct Jobs</b> |
|---------------------------|--------------------------------------|----------------------------------------|--------------------|
| POME                      | \$ 372                               | \$ 179                                 | 62                 |
| AAEE                      | \$ 437                               | \$ 164                                 | 60                 |
| HEFA Swine HTL            | \$ 592                               | \$ 153                                 | 46                 |
| Sludge HTL                | \$ 474                               | \$ 139                                 | 46                 |
| FOG via HEFA              | \$ 184                               | \$ 205                                 | 60                 |

133 We estimate net employment impacts, defined as the difference in the number of annual full-time  
 134 equivalent jobs under each scenario compared to the BAU, considering the employment effect in the  
 135 relevant biofuel and petroleum sectors. Job effects account for both construction and operation in each  
 136 year and are estimated at the national level. Net effects reflect reduced employment from conventional  
 137 diesel production and the positive effect from the deployment and expansion of MCCI bio-blendstocks.  
 138 Production volumes for each type of fuel and construction schedules are provided by BSM.  
 139 It is worth noting that an Input-output model such as BEIOM can only estimate change in number of jobs  
 140 due to a change in demand for a product. Therefore, the estimated change in jobs reflects the demand  
 141 side rather than job supply or availability of labor force, which meets the desired skills. The occupational  
 142 dataset we are currently adding to our model will allow us to breakdown total job numbers by occupations  
 143

144 and their respective wages, skill levels, education, and training requirements, but these will represent  
145 demand for workers. The availability of skilled workers will depend on locations and other factors and is  
146 not addressed in the paper as it is beyond the scope of our model.

#### 147 **Additional Information on the Biomass Scenario Model (BSM)**

148 Techno-economic characteristics change over time in the BSM, as the industry matures with more  
149 biorefineries being built. The BSM takes nth-plant conversion costs and uses a learning curve calculation,  
150 along with current technology maturity, to determine the modeled annual cost for constructing and  
151 operating the biorefineries. Costs and yields for the specific conversion technologies improve over time  
152 as more biorefineries are built.<sup>17</sup> More information on BSM logic, including learning curves, can be found  
153 in Peterson et al.<sup>18</sup>

154 Also, in addition to MCCI fuel pathways, the BSM model includes currently available biofuel pathways  
155 (biodiesel from transesterification and starch ethanol) and other feedstocks (dairy manure, food waste,  
156 algae) and conversion technologies (e.g., indirect liquefaction, catalytic fast pyrolysis, fermentation) that  
157 could be available in the future. These technologies can produce fuels other than diesel (i.e., gasoline, jet  
158 fuel, bio-oil).

#### 159 **Carbon Tax Additional Information**

160 The level of tax required to offset the energy density difference is different for each bio-blendstock.  
161 Among the MCCI fuels, only POME has the potential for an engine efficiency gain, but it is estimated at a  
162 modest 1%. With an energy density of only about 62% that of diesel fuel, POME fuel as a replacement for  
163 diesel will lead to the largest fuel economy decline, despite the small engine efficiency gain. Renewable  
164 diesel via Sludge HTL, HEFA, and swine manure HTL have energy densities that are comparatively closer  
165 to that of diesel. Renewable diesel via Sludge HTL has about 3% fewer BTUs per gallon, FOG has about 6%  
166 fewer BTUs per gallon, and swine manure has only about a 3% difference in BTUs per gallon. The  
167 implication is that RD—via Sludge HTL, FOG, and swine manure—could be cost competitive with diesel  
168 under smaller price differentials than the other fuels would require.

169 We considered several tax structures (Figure A5) and compared adoption results. Tax structure 1 had an  
170 initial cost penalty of \$15/metric ton of CO<sub>2</sub> emissions, which increased at a linear rate of \$10 per year.  
171 Tax structure 2 had an initial cost penalty of \$35/metric ton of CO<sub>2</sub> emissions and increased at a rate of  
172 5% year over year, resulting in a steeper rise each consecutive year. Tax structure 3 had an initial cost  
173 penalty of \$52/metric ton of CO<sub>2</sub> emissions and increased at a linear rate of \$1.06 per year. Tax structure  
174 3 resulted in a smooth adoption curve for co-optimized vehicles, and was applied to the carbon tax ADOPT  
175 scenarios.

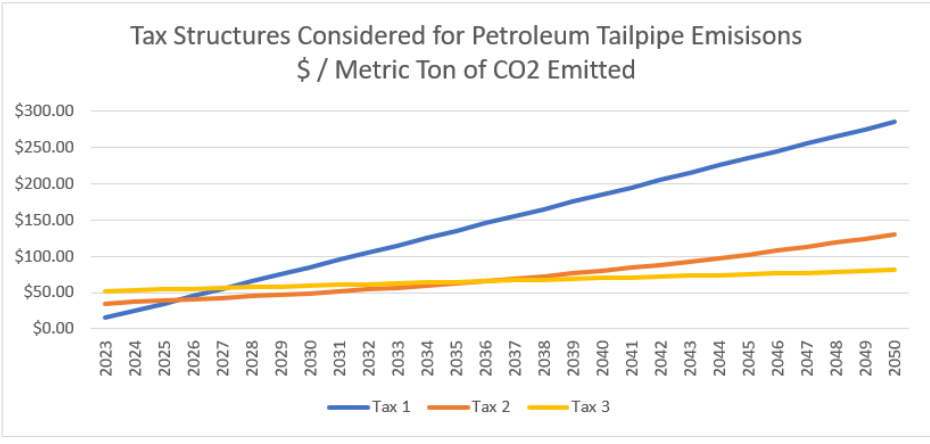

176

177 Figure A5. Tax structure considered for petroleum tailpipe emissions.

178 We performed trial runs in the ADOPT model to examine the effects of each tax structure on vehicle sales  
 179 and to determine under which structure co-optimized fuels would be price competitive, not only with  
 180 diesel fuel but also with fuel cell and battery electric vehicles. Fuels at the lower range of energy density  
 181 (such as POME) were not price competitive under any tax structure. If too little tax was applied, POME  
 182 was not price competitive with diesel. However, if too great a tax was applied, fuel cells and battery  
 183 electric vehicles saw more sales benefits than co-optimized vehicles. In this analysis, co-optimized fuel  
 184 was blended with diesel fuel, and so a tax on diesel fuel still increased the operating costs of co-optimized  
 185 powertrains in relation to powertrains that do not rely on diesel fuel at all (fuel cells and battery electric  
 186 vehicles). For the higher energy density fuels, imposing a sales tax on diesel fuel CO<sub>2</sub> emissions could offset  
 187 the slightly higher price per BTU of the co-optimized bio-blendstock without increasing the diesel  
 188 fraction's price so significantly that the fuel cell and BEVs become more affordable than the co-optimized  
 189 vehicles. The ADOPT sales results are shown for Scenario 1.3 Renewable Diesel via Sludge HTL (Figure A6).

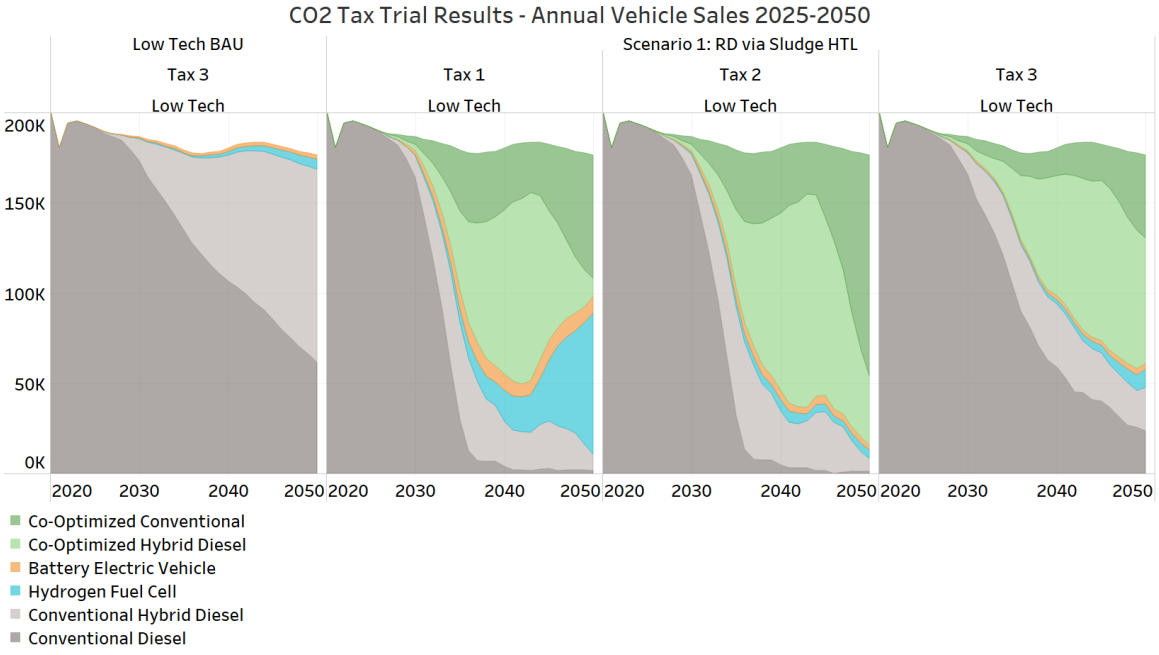

190



191 **Figure A6. CO<sub>2</sub> tax scenario results**

192 In the scenario with no carbon tax, we see very limited adoption of co-optimized vehicles (maximum of  
 193 16% of total annual vehicle sales). In the “Tax 1” scenario (which had the highest tax on diesel CO<sub>2</sub>  
 194 emissions) we see rapid increases in the sales of co-optimized vehicles until about 2040, at which point  
 195 fuel cells begin to displace co-optimized sales. In the “Tax 2” case, we again see a rapid increase in the  
 196 sales of co-optimized vehicles, which continues mostly through 2050 except for during the period in the  
 197 early to mid-2040s. In the “Tax 3” case, we see a smoother and more gradual increase in the sales of co-  
 198 optimized vehicles per year, and this tax was selected for the ADOPT carbon tax scenarios.

199 **Vehicle Analysis Additional Results**

200 The carbon tax helps co-optimized vehicles to compete with diesel powertrains only. Electric vehicles and  
 201 fuel cell vehicles (powertrains that consume no diesel fuel) are not affected by this carbon tax. Under the  
 202 price and blend fraction assumptions in this analysis, for some of the lower energy density fuels there is  
 203 no tax level at which co-optimized vehicles can outcompete both diesel and other alternative powertrains.  
 204 If the tax level is set high enough to price-advantage co-optimized vehicles over 100% diesel vehicles, then  
 205 it is also set too high for co-optimized vehicles to compete with BEVs and fuel cells. In order to drive sales  
 206 of vehicles powered by POME and AAEE, the prices of these fuels would need to be reduced to  
 207 compensate for the energy density differences, or the blend fraction would need to be increased and a  
 208 carbon tax at a high enough level would need to be imposed.

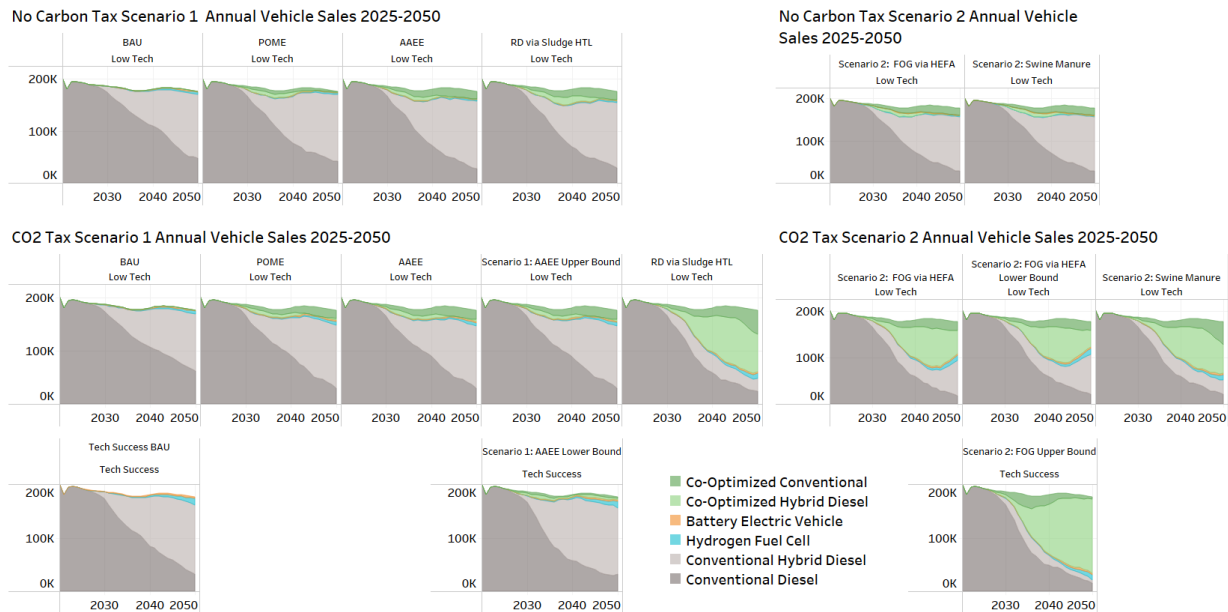

209  
 210 **Figure A7. Annual vehicle sales 2020-2050 for different carbon tax scenarios**

211 **Job Analysis Additional Results**

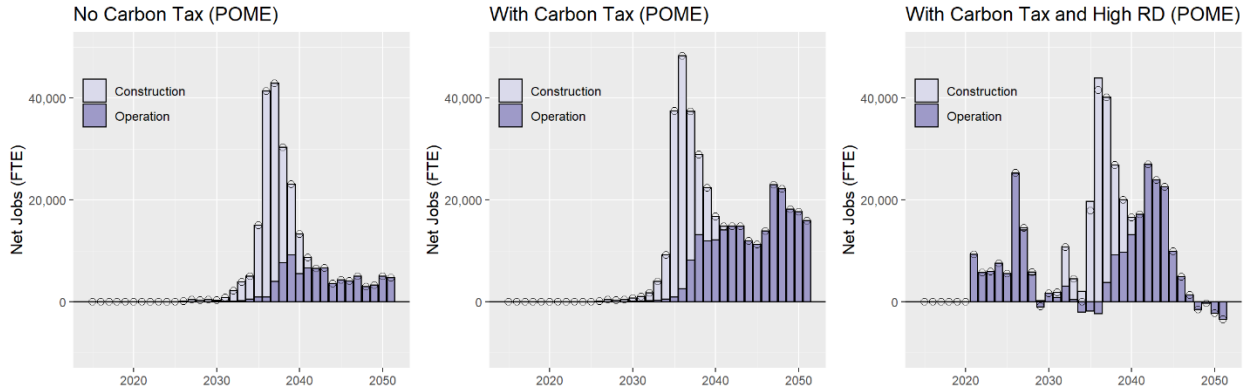

212  
213

Figure A8. Net jobs (FTE) by MCCI bio-blendstock, diesel market, breakdown, POME

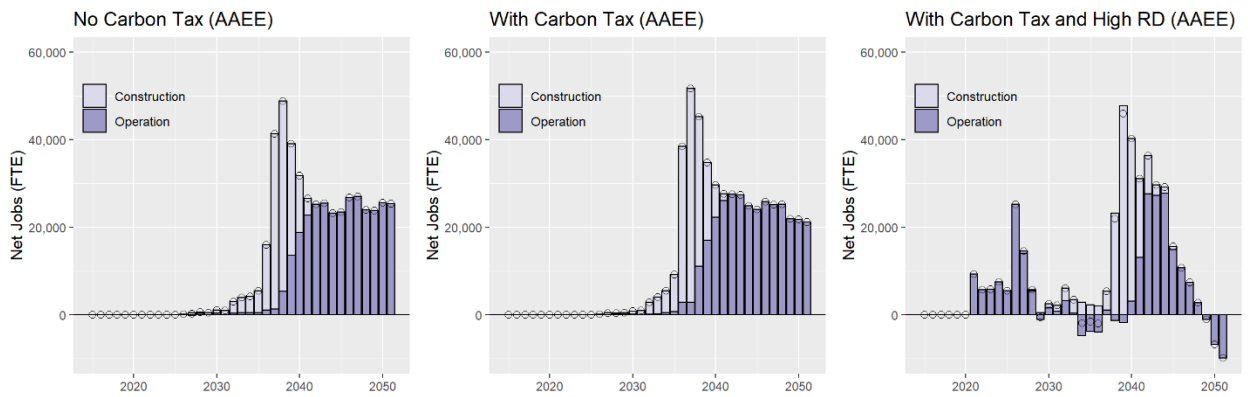

214  
215

Figure A9. Net jobs (FTE) by MCCI bio-blendstock, diesel market, breakdown, AAEE

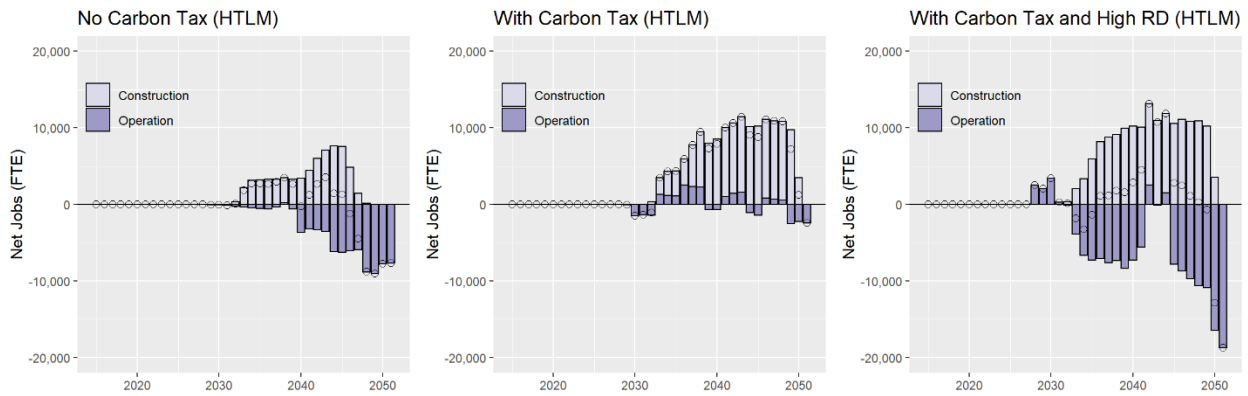

216  
217

Figure A10. Net jobs (FTE) by MCCI bio-blendstock, diesel market, breakdown, HEFA swine HTL

218

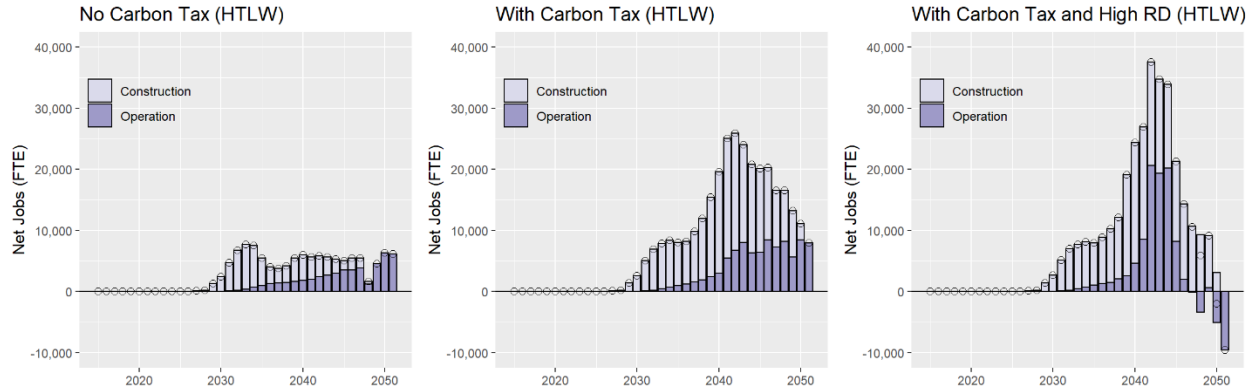

219  
220 Figure A11. Net jobs (FTE) by MCCI bio-blendstock, diesel market, breakdown, sludge HTL

221 **Sensitivity Analysis**

222 Table A3. Key modeling assumptions for the optimistic and pessimistic bounding cases of each scenario

|                             |                                            | Scenario 1              |                          | Scenario 2                        |                                   | Scenario 3              |                          |
|-----------------------------|--------------------------------------------|-------------------------|--------------------------|-----------------------------------|-----------------------------------|-------------------------|--------------------------|
|                             |                                            | Optimistic, Upper Bound | Pessimistic, Lower Bound | Optimistic, Upper Bound           | Pessimistic, Lower Bound          | Optimistic, Upper Bound | Pessimistic, Lower Bound |
| <b>MCCI Bio-blendstocks</b> |                                            | AAEE                    | AAEE                     | FOG via HEFA and Swine manure HTL | FOG via HEFA and Swine manure HTL | AAEE                    | AAEE                     |
| <b>ADOPT Key Variables</b>  | Blend fraction                             | 30%                     | 10%                      | 30%                               | 10%                               | 30%                     | 10%                      |
|                             | Co-optimized engine efficiency improvement | 0%                      | 0%                       | 0%                                | 0%                                | 0%                      | 0%                       |
|                             | Incremental cost                           | \$100                   | \$1,000                  | \$100                             | \$1,000                           | \$100                   | \$1,000                  |
|                             | Aftertreatment cost reduction              | (\$4,932)               | (\$4,563)                | (\$4,932)                         | (\$4,563)                         | (\$4,932)               | (\$4,563)                |
|                             | Tech targets                               | Baseline Tech Goals     | Tech Success             | Aggressive Goals                  | Baseline Goals                    | Aggressive Goals        | Baseline Goals           |
|                             | Price of Co-optimized fuel assumption      | Diesel                  |                          | Diesel                            |                                   | Diesel                  |                          |
|                             | Prices of conventional fuels               | 2021 TDA                |                          | 2021 TDA                          |                                   | 2021 TDA                |                          |

|                                     |                                                    |                                          |                                                 |                                          |                                                 |                                                        |             |
|-------------------------------------|----------------------------------------------------|------------------------------------------|-------------------------------------------------|------------------------------------------|-------------------------------------------------|--------------------------------------------------------|-------------|
| <b>BSM Key Variables</b>            | Policy effects                                     | RFS RINs & LCFS credits: Base - Included | RFS RINs & LCFS credits: Sensitivity - Excluded | RFS RINs & LCFS credits: Base - Included | RFS RINs & LCFS credits: Sensitivity - Excluded | RFS RINs & LCFS credits: Included for more/all regions |             |
|                                     | Biorefineries are Built to Meet Demand             | Yes                                      | No                                              | Yes                                      | No                                              | Yes                                                    | No          |
|                                     | Consumer price sensitivity                         | High                                     | Expected                                        | High                                     | Expected                                        | High                                                   | Expected    |
|                                     | Capital cost of refineries                         | Low                                      | High                                            | Low                                      | High                                            | Low                                                    | High        |
|                                     | Maximum number of biorefineries built per year     | Unlimited                                | 25                                              | Unlimited                                | 25                                              | Unlimited                                              | 25          |
|                                     | Rate of return required from biorefinery investors | Low                                      | High                                            | Low                                      | High                                            | Low                                                    | High        |
| <b>Bioeconomy AGE Key Variables</b> | Feedstock type                                     | Corn stover                              | Corn stover                                     | FOG                                      | Swine manure                                    | Corn stover                                            | Corn stover |
|                                     | Life-cycle GHG Emissions (g CO <sub>2</sub> e/MJ)  | 32.5                                     | 32.5                                            | 11.2                                     | -31.5                                           | 32.5                                                   | 32.5        |

223  
224 We perform sensitivity analysis with AAEE and HEFA swine HTL RD as the bio-blendstocks considering a  
225 pessimistic case and an optimistic case (Table A3) with carbon tax and with carbon tax and high RD.

226 *With carbon tax case*

227 The GHG emissions for the BAU and sensitivity cases is given in Figure A12. In the pessimistic case,  
228 although the blending level of AAEE bio-blendstock is lowered to 10%, the excess supply of AAEE above  
229 the demand by the co-optimized vehicles coupled with greater success and progress in conventional  
230 vehicle technologies relative to the MCCI vehicles results in ~23% reduction in GHG emissions relative to  
231 the BAU with carbon tax. This reduction is primarily driven by the decrease in fuel use in the AAEE 10%  
232 scenario due to higher vehicle fuel economy driven by technology success, with about 10% of the benefit  
233 associated with the bio-blendstock. Compared to AAEE scenario, emissions reduction in the HEFA swine  
234 HTL with a 10% blending level reach ~7% in 2050 relative to BAU, with the primary driver being the bio-  
235 blendstock.

236 In the optimistic case, GHG emissions decrease by ~12% (given a 15% market share of AEE in 2050 at a  
237 30% blending level combined with excess production consumed by the conventional vehicles) in the AAEE  
238 scenario and a 34.4% reduction in the HEFA swine HTL scenario. The emissions reduction in the HEFA  
239 swine HTL scenario is primarily driven by the combined effect of co-optimized technologies and fuel  
240 reduction due to improved fuel economy because of progress in conventional vehicle technologies. The

241 benefit also can be partly linked to the increase in BD/RD consumption to make up for the inability of  
 242 HEFA swine HTL RD to meet the demand in the case with carbon tax only (Table A4).

243 *With carbon tax and high renewable diesel case*

244 With carbon tax and high penetration of RD in the BAU and the sensitivity cases, emissions decreased by  
 245 ~24% and 5% in the AAEE and HEFA swine HTL scenarios, respectively, relative to the BAU with carbon tax  
 246 and high RD in the pessimistic case. In the optimistic case, the HEFA swine HTL scenario offers GHG  
 247 emissions benefit in 2050 representing 66 million metric tons or ~45% reduction driven by high  
 248 penetration of co-optimized fuel/vehicle technologies and improved fuel economy in conventional vehicle  
 249 technologies. GHG emissions also decrease by 15 million metric tons, or ~10%, in the AAEE scenario,  
 250 driven by the reduction in the petroleum diesel consumption in 2050 (Table A4).

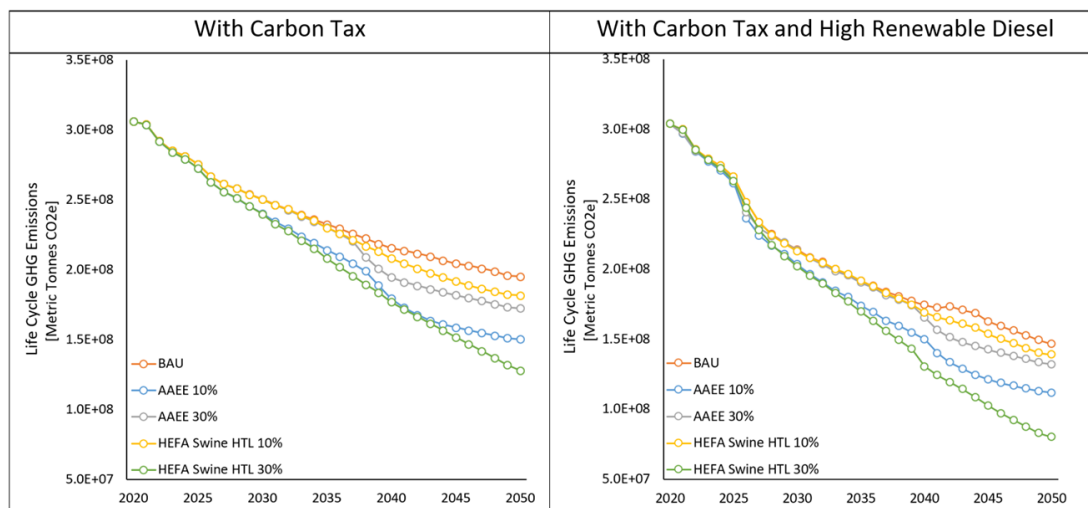

251  
 252 Figure A12. GHG emissions of BAU and sensitivity cases

253 Table A4. Fuel share by fuel type (energy basis) in 2050

|                   | With carbon tax    |              |              |                        |                        | With carbon tax and high RD    |              |              |                        |                        |
|-------------------|--------------------|--------------|--------------|------------------------|------------------------|--------------------------------|--------------|--------------|------------------------|------------------------|
|                   | BAU with C tax (%) | AAEE 10% (%) | AAEE 30% (%) | HEFA swine HTL 10% (%) | HEFA swine HTL 30% (%) | BAU with C tax and high RD (%) | AAEE 10% (%) | AAEE 30% (%) | HEFA swine HTL 10% (%) | HEFA swine HTL 30% (%) |
| Diesel blendstock | 80.9               | 64.3         | 66.9         | 77.3                   | 57.6                   | 55.9                           | 41.4         | 45.6         | 55.6                   | 38.8                   |
| Biodiesel         | 11.8               | 13.3         | 11.9         | 12.5                   | 24.3                   | 16.7                           | 18.3         | 16.5         | 15.4                   | 17.0                   |
| RD                | 6.5                | 6.5          | 5.3          | 6.1                    | 12.9                   | 26.7                           | 24.1         | 21.7         | 24.4                   | 27.0                   |
| Electricity       | 0.5                | 0.7          | 0.5          | 0.7                    | 0.7                    | 0.5                            | 0.7          | 0.5          | 0.8                    | 0.7                    |
| Hydrogen          | 0.3                | 0.5          | 0.3          | 0.5                    | 0.4                    | 0.3                            | 0.5          | 0.3          | 0.5                    | 0.4                    |
| AAEE              |                    | 14.8         | 15           |                        |                        |                                | 15           | 15.4         |                        |                        |
| Swine manure HTL  |                    |              |              | 2.9                    | 4.0                    |                                |              |              | 3.3                    | 16.1                   |

254 Tech Success and Sensitivity Cases

255 The tech success represents a scenario with greater success and progress in conventional vehicle  
 256 technologies relative to the co-optimized vehicles. Figure A13 illustrates the GHG emissions between the

257 tech success and selected sensitivity scenarios (scenarios with tech success and co-optimized  
 258 technologies) with carbon tax and with carbon tax and high RD, respectively. In all cases, the AAEE  
 259 scenarios (pessimistic case) show lower GHG emissions than the tech success because of a reduction in  
 260 diesel consumption due to the increased production of MCCI fuel (Table A5). The HEFA swine HTL scenario  
 261 (optimistic case) also shows lower emissions in all cases than the tech success: 24% and 33% lower  
 262 emissions than the tech success in the case with carbon tax and with carbon tax and high RD, respectively.  
 263 Table A5. Fuel share by fuel type (energy basis) in 2050

|                   | With carbon tax  |              |                        | With carbon tax and high RD |              |                        |
|-------------------|------------------|--------------|------------------------|-----------------------------|--------------|------------------------|
|                   | Tech success (%) | AAEE 10% (%) | HEFA swine HTL 30% (%) | Tech success (%)            | AAEE 10% (%) | HEFA swine HTL 30% (%) |
| Diesel blendstock | 78.2             | 64.3         | 57.6                   | 49.8                        | 41.4         | 38.8                   |
| Biodiesel         | 13.3             | 13.3         | 24.3                   | 18.8                        | 18.3         | 17.0                   |
| RD                | 7.4              | 6.5          | 12.9                   | 30.2                        | 24.1         | 27.0                   |
| Electricity       | 0.7              | 0.7          | 0.7                    | 0.7                         | 0.7          | 0.7                    |
| Hydrogen          | 0.5              | 0.5          | 0.4                    | 0.5                         | 0.5          | 0.4                    |
| AAEE              |                  | 14.8         |                        |                             | 15           |                        |
| Swine manure HTL  |                  |              | 4.0                    |                             |              | 16.1                   |

264

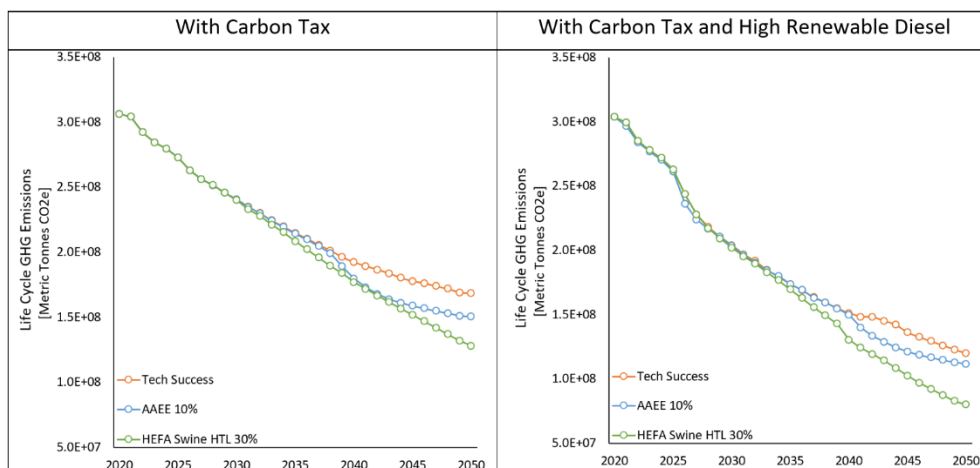

265

266 Figure A13. GHG emissions of tech success and sensitivity cases

267

268

269

270

271

272

273 **References**

- 274 1. United States Energy Information Administration (EIA), Annual Energy Outlook 2021.  
275 [https://www.eia.gov/outlooks/aeo/tables\\_ref.php](https://www.eia.gov/outlooks/aeo/tables_ref.php), (accessed October 13, 2022).  
276
- 277 2. IHS Markit, America’s New Energy Future: The Unconventional Oil and Gas Revolution and the US  
278 Economy, A Manufacturing Renaissance, 2013, [https://www.api.org/~media/Files/Policy/American-](https://www.api.org/~media/Files/Policy/American-Energy/Americas_New_Energy_Future_Mfg_Renaissance_Main_Report_4Sept13.pdf)  
279 [Energy/Americas New Energy Future Mfg Renaissance Main Report 4Sept13.pdf](https://www.api.org/~media/Files/Policy/American-Energy/Americas_New_Energy_Future_Mfg_Renaissance_Main_Report_4Sept13.pdf) (accessed  
280 December 27, 2022).
- 281 3. PricewaterhouseCoopers (PwC), The New Equation- Building Trust -Delivering Sustained Outcomes,  
282 [https://www.pwc.com/gx/en/about-pwc/global-annual-review-2021/downloads/pwc-global-](https://www.pwc.com/gx/en/about-pwc/global-annual-review-2021/downloads/pwc-global-annual-review-2021.pdf)  
283 [annual-review-2021.pdf](https://www.pwc.com/gx/en/about-pwc/global-annual-review-2021/downloads/pwc-global-annual-review-2021.pdf) (accessed December 27, 2022).
- 284 4. S. A. Low, and A. M. Isserman, Ethanol and the Local Economy: Industry Trends, Location Factors,  
285 Economic Impacts, and Risks, *Economic Development Quarterly*, 2009, **1**, 71–88.
- 286 5. S. Ye, Economic Impact of the Minnesota Biodiesel Industry, Minnesota Department of Agriculture,  
287 2017. <https://www.mda.state.mn.us/sites/default/files/2018-07/biodimimpactexecsumm.pdf>,  
288 (accessed December 27, 2022).
- 289 6. B. Guerrero, B. Golden, S. Amosson, J. Johnson, and L. Almas, The Impact of Ethanol in Western  
290 Kansas, Texas A&M Agrilife Extension, 2019, [https://cdn-ext.agnet.tamu.edu/wp-](https://cdn-ext.agnet.tamu.edu/wp-content/uploads/2019/11/E-261-The-Impact-of-Ethanol-in-Western-Kansas.pdf)  
291 [content/uploads/2019/11/E-261-The-Impact-of-Ethanol-in-Western-Kansas.pdf](https://cdn-ext.agnet.tamu.edu/wp-content/uploads/2019/11/E-261-The-Impact-of-Ethanol-in-Western-Kansas.pdf), (accessed October  
292 20, 2022).
- 293 7. J. M. Urbanchuk, Contribution of the Renewable Fuels Industry to the Economy of Iowa, ABF  
294 Economics, 2022, <https://iowarfa.org/economicimpactstudy/>, (accessed December 27, 2022).
- 295 8. P. Lamers, A. F. T. Avelino, Y. Zhang, E. C. D. Tan, B. Young, J. Vendries, and H. Chum, Potential  
296 Socioeconomic and Environmental Effects of an Expanding U.S. Bioeconomy: An Assessment of Near-  
297 Commercial Cellulosic Biofuel Pathways, *Environ. Sci. Technol.*, 2021, **8**, 5496–5505.
- 298 9. R. W. Jackson, A. B. F. Neto, and E. Erfanian, Woody Biomass Processing: Potential Economic Impacts  
299 on Rural Regions, *Energy Policy*, 2018, **115**, 66-77.
- 300 10. Bio Economic Research Associate (bio-era), U.S. Economic Impact of Advanced Biofuels Production:  
301 Perspectives to 2030,  
302 <https://www.bio.org/sites/default/files/legacy/bioorg/docs/EconomicImpactAdvancedBiofuels.pdf>,  
303 (accessed October 20, 2022).
- 304 11. A. F. T. Avelino, P. Lamers, Z. Yimin, and H. Chum, Creating a Harmonized Time Series of  
305 Environmentally-Extended Input-Output Tables to Assess the Evolution of the US Bioeconomy—A  
306 Retrospective Analysis of Corn Ethanol and Soybean Biodiesel, *J. Clean. Prod.*, 2021, **321**, 128890
- 307 12. U.S. Bureau of Economic Analysis, 2012 Benchmark Input-Output Tables [Data file],  
308 <https://www.bea.gov/industry/input-output-accounts-data>, (accessed December 27, 2022).
- 309 13. U.S. Bureau of Economic Analysis, National Income and Product Accounts [Data file],  
310 [https://apps.bea.gov/iTable/index\\_nipa.cfm](https://apps.bea.gov/iTable/index_nipa.cfm), (accessed November 3, 2022).

311 14. A., Dutta, M. Talmadge, J. Hensley, M. Worley, D. Dudgeon, D. Barton, P. Groenendijk, D. Ferrari, B.  
312 Stears, E. M. Searcy, C. T. Wright, and J. R. Hess, Process Design and Economics for Conversion of  
313 Lignocellulosic Biomass to Ethanol: Thermochemical Pathway by Indirect Gasification and Mixed  
314 Alcohol Synthesis, NREL/TP-5100-51400, National Renewable Energy Laboratory (NREL) Golden CO,  
315 United States, 2011.

316 15. L. Snowden-Swan, R. Hallen, Y. Zhu, T. Hart, Bearden, M., Liu, J., Seiple, T., Albrecht, K., Jones, S., Fox,  
317 S., Schmidt, A., Maupin, G., Billing, J., and D. Elliott, Conceptual Biorefinery Design and Research  
318 Targeted for 2022: Hydrothermal Liquefaction Processing of Wet Waste to Fuels. PNNL-27186. Pacific  
319 Northwest National Laboratory (PNNL), Richland, WA, United States, 2017.

320 16. L. Tao, A. Milbrandt, Y. Zhang, and W. Wang, Techno-Economic and Resource Analysis of  
321 Hydroprocessed Renewable Jet Fuel, *Biotechnol. Biofuels*, 2017, **10**, 261.

322 17. The University of Tennessee, "Agricultural Policy Analysis Center Research Tools - POLYSYS."  
323 Agricultural Policy Analysis Center - The University of Tennessee.  
324 <http://www.agpolicy.org/polysys.html>, (accessed May 12, 2023).

325 18. S. Peterson, C. Peck, D. Stright, E. Newes, D. Inman, L. Vimmerstedt, S. Hsu, and B. Bush, Overview of  
326 the Biomass Scenario Model, NREL/CP-6A20-60172, National Renewable Energy Laboratory (NREL),  
327 Golden, CO, United States, 2015.

328  
329  
330  
331  
332
